# Supplementary material for: Association of Glutathione s-transferase M1 and T1 gene polymorphisms with the susceptibility to acquired sensorineural hearing loss: a systematic review and meta-analysis
Source: PubMed Central journal article supplement (PMC6351579; doi:10.1038/s41598-018-37386-w), 2019-01-29
Supplement: 41598_2018_37386_MOESM1_ESM.pdf [file 41598_2018_37386_MOESM1_ESM.pdf]

**Association of Glutathione s-transferase M1 and T1 gene polymorphisms with the susceptibility to acquired sensorineural hearing loss: a systematic review and meta-analysis**

Shimin Zong<sup>1+</sup>, Xue Zeng<sup>2+</sup>, Yexiao Guan<sup>1+</sup>, Tianyi Liu<sup>1</sup>, Pan Luo<sup>1</sup>, Fangmin Wan<sup>1</sup>, Yanji Qu<sup>1</sup>, Pei Chen<sup>3</sup>, Hongjun Xiao<sup>1\*</sup>

<sup>1</sup> Department of Otorhinolaryngology, Union Hospital, Tongji Medical College, Huazhong University of Science and Technology, Wuhan 430022, China

<sup>2</sup>Department of Obstetrics and Gynecology, Tongji Hospital, Tongji Medical College, Huazhong University of Science and Technology, Wuhan 430032, China

<sup>3</sup>Department of Otorhinolaryngology, Wuhan Integrated TCM and Western Medicine Hospital (Wuhan No. 1 hospital), Tongji Medical College, Huazhong University of Science and Technology, Wuhan 430022, China

\*Corresponding. xhjent\_whxh@hust.edu.cn (Hongjun Xiao)

<sup>+</sup>The authors contribute equally to this work.

|               | Gene name | Before<br>meta-regression | After<br>meta-regression | Variation |
|---------------|-----------|---------------------------|--------------------------|-----------|
| Tau - squared | GST M1    | 0.0901                    | 0.06719                  | 25.4%     |
|               | GST T1    | 0.1757                    | 0.2011                   | -         |

**Supplementary Table 1.** Results of meta-regression considering sample size, publication year and NOS scores of the included studies. GST: glutathione s-transferase.
